# Supplementary material for: Molecular hydrogen binding affinities of metal cation decorated substituted benzene systems: insight from computational exploration
Source: Royal Society of Chemistry journal article supplement (doi:10.1039/c5ra09884j), 2015-01-01
Supplement: c5ra09884j1.pdf [file c5ra09884j1.pdf]

Supporting information

| System                  | Method  | Basis set    | Binding energy<br>(kcal/mol) | Binding energy<br>corrected (kcal/mol) |
|-------------------------|---------|--------------|------------------------------|----------------------------------------|
| $1_{\text{li-ben}}$     | B3LYP   | 6-31G(d)     | -2.32                        | -1.93                                  |
|                         |         | 6-311+G(d,p) | -2.73                        | -2.58                                  |
|                         |         | TZVP         | -2.67                        | -2.44                                  |
|                         | MP2     | 6-31G(d)     | -2.42                        | -1.49                                  |
|                         |         | 6-311+G(d,p) | -3.35                        | -2.52                                  |
|                         |         | TZVP         | -2.67                        | -2.16                                  |
|                         | B2PLYPD | 6-31G(d)     | -3.66                        | -3.09                                  |
|                         |         | 6-311+G(d,p) | -4.46                        | -4.05                                  |
|                         |         | TZVP         | -4.15                        | -3.79                                  |
| $1_{\text{li-aniline}}$ | B3LYP   | 6-31G(d)     | -2.06                        | -1.68                                  |
|                         |         | 6-311+G(d,p) | -2.43                        | -2.28                                  |
|                         |         | TZVP         | -2.40                        | -2.17                                  |
|                         | MP2     | 6-31G(d)     | -2.22                        | -1.26                                  |
|                         |         | 6-311+G(d,p) | -3.09                        | -2.27                                  |
|                         |         | TZVP         | -2.38                        | -1.69                                  |
|                         | B2PLYPD | 6-31G(d)     | -3.38                        | -2.79                                  |
|                         |         | 6-311+G(d,p) | -4.12                        | -3.71                                  |
|                         |         | TZVP         | -3.85                        | -3.44                                  |
| $1_{\text{li-methyl}}$  | B3LYP   | 6-31G(d)     | -2.19                        | -1.80                                  |
|                         |         | 6-311+G(d,p) | -2.58                        | -2.45                                  |
|                         |         | TZVP         | -2.53                        | -2.30                                  |
|                         | MP2     | 6-31G(d)     | -2.34                        | -1.39                                  |
|                         |         | 6-311+G(d,p) | -3.24                        | -2.44                                  |
|                         |         | TZVP         | -2.58                        | -2.08                                  |
|                         | B2PLYPD | 6-31G(d)     | -3.57                        | -2.99                                  |
|                         |         | 6-311+G(d,p) | -4.34                        | -3.96                                  |
|                         |         | TZVP         | -4.05                        | -3.69                                  |
| $1_{\text{li-cyano}}$   | B3LYP   | 6-31G(d)     | -2.58                        | -2.21                                  |
|                         |         | 6-311+G(d,p) | -3.07                        | -2.94                                  |
|                         |         | TZVP         | -2.93                        | -2.70                                  |
|                         | MP2     | 6-31G(d)     | -2.55                        | -1.66                                  |
|                         |         | 6-311+G(d,p) | -3.56                        | -2.79                                  |
|                         |         | TZVP         | -2.85                        | -2.34                                  |
|                         | B2PLYPD | 6-31G(d)     | -3.82                        | -3.24                                  |
|                         |         | 6-311+G(d,p) | -4.62                        | -4.24                                  |
|                         |         | TZVP         | -4.31                        | -3.93                                  |
|                         | B3LYP   | 6-31G(d)     | -2.34                        | -1.94                                  |
|                         |         | 6-311+G(d,p) | -2.81                        | -2.69                                  |
|                         |         | TZVP         | -2.72                        | -2.49                                  |

|                         |         |              |       |       |
|-------------------------|---------|--------------|-------|-------|
| I <sub>li-benzoic</sub> | MP2     | 6-31G(d)     | -2.41 | -1.48 |
|                         |         | 6-311+G(d,p) | -3.36 | -2.58 |
|                         |         | TZVP         | -2.76 | -2.19 |
|                         | B2PLYPD | 6-31G(d)     | -3.64 | -3.04 |
|                         |         | 6-311+G(d,p) | -4.52 | -4.15 |
|                         |         | TZVP         | -4.10 | -3.71 |

**Table S1.** Binding energy values (kcal/mol) for C<sub>6</sub>H<sub>6</sub>-Li<sup>+</sup> and C<sub>6</sub>H<sub>5</sub>X-Li<sup>+</sup> complexes at *ab initio* and different density functional methods in conjunction with 6-31G(d), 6-311+G(d,p) and TZVP basis sets.

| System                  | Method  | Basis set    | Binding energy<br>(kcal/mol) | Binding energy<br>corrected (kcal/mol) |
|-------------------------|---------|--------------|------------------------------|----------------------------------------|
| $1_{\text{mg-ben}}$     | B3LYP   | 6-31G(d)     | -11.74                       | -11.36                                 |
|                         |         | 6-311+G(d,p) | -13.45                       | -13.24                                 |
|                         |         | TZVP         | -11.94                       | -11.87                                 |
|                         | MP2     | 6-31G(d)     | -11.16                       | -9.98                                  |
|                         |         | 6-311+G(d,p) | -12.99                       | -12.18                                 |
|                         |         | TZVP         | -10.78                       | -10.30                                 |
|                         | B2PLYPD | 6-31G(d)     | -12.21                       | -11.63                                 |
|                         |         | 6-311+G(d,p) | -14.00                       | -13.60                                 |
|                         |         | TZVP         | -12.17                       | -11.97                                 |
| $1_{\text{mg-aniline}}$ | B3LYP   | 6-31G(d)     | -10.22                       | -9.85                                  |
|                         |         | 6-311+G(d,p) | -11.86                       | -11.67                                 |
|                         |         | TZVP         | -10.38                       | -10.30                                 |
|                         | MP2     | 6-31G(d)     | -9.95                        | -8.81                                  |
|                         |         | 6-311+G(d,p) | -11.88                       | -11.10                                 |
|                         |         | TZVP         | -9.53                        | -9.06                                  |
|                         | B2PLYPD | 6-31G(d)     | -10.82                       | -10.26                                 |
|                         |         | 6-311+G(d,p) | -12.65                       | -12.27                                 |
|                         |         | TZVP         | -10.74                       | -10.53                                 |
| $1_{\text{mg-methyl}}$  | B3LYP   | 6-31G(d)     | -11.16                       | -10.78                                 |
|                         |         | 6-311+G(d,p) | -12.82                       | -12.41                                 |
|                         |         | TZVP         | -11.35                       | -11.28                                 |
|                         | MP2     | 6-31G(d)     | -10.69                       | -9.51                                  |
|                         |         | 6-311+G(d,p) | -12.54                       | -11.73                                 |
|                         |         | TZVP         | -10.37                       | -9.89                                  |
|                         | B2PLYPD | 6-31G(d)     | -11.71                       | -11.12                                 |
|                         |         | 6-311+G(d,p) | -13.31                       | -12.91                                 |
|                         |         | TZVP         | -11.66                       | -11.46                                 |
| $1_{\text{mg-cyano}}$   | B3LYP   | 6-31G(d)     | -12.07                       | -11.69                                 |
|                         |         | 6-311+G(d,p) | -13.91                       | -13.70                                 |
|                         |         | TZVP         | -12.38                       | -12.32                                 |
|                         | MP2     | 6-31G(d)     | -11.44                       | -10.28                                 |
|                         |         | 6-311+G(d,p) | -13.35                       | -12.54                                 |
|                         |         | TZVP         | -11.21                       | -10.73                                 |
|                         | B2PLYPD | 6-31G(d)     | -12.53                       | -11.94                                 |
|                         |         | 6-311+G(d,p) | -14.41                       | -14.00                                 |
|                         |         | TZVP         | -12.66                       | -12.46                                 |

**Table S2.** Binding energy values (kcal/mol) for  $C_6H_6-Mg^{2+}$  and  $C_6H_5X-Mg^{2+}$  complexes at *ab initio* and different density functional methods in conjunction with 6-31G(d), 6-311+G(d,p) and TZVP basis sets

| System                  | $\rho$ | $\nabla^2\rho$ | System                 | $\rho$ | $\nabla^2\rho$ | System                  | $\rho$ | $\nabla^2\rho$ |
|-------------------------|--------|----------------|------------------------|--------|----------------|-------------------------|--------|----------------|
| 1 <sub>li-ben</sub>     | 0.0154 | 0.0824         | 1 <sub>li-methyl</sub> | 0.0153 | 0.0823         | 1 <sub>li-benzoic</sub> | 0.0155 | 0.0827         |
| 2 <sub>li-ben</sub>     | 0.0138 | 0.0753         | 2 <sub>li-methyl</sub> | 0.0139 | 0.0760         | 2 <sub>li-benzoic</sub> | 0.0139 | 0.0755         |
|                         | 0.0138 | 0.0753         |                        | 0.0135 | 0.0744         |                         | 0.0142 | 0.0773         |
| 3 <sub>li-ben</sub>     | 0.0123 | 0.0682         | 3 <sub>li-methyl</sub> | 0.0123 | 0.0687         | 3 <sub>li-benzoic</sub> | 0.0128 | 0.0709         |
|                         | 0.0123 | 0.0682         |                        | 0.0123 | 0.0686         |                         | 0.0126 | 0.0697         |
|                         | 0.0123 | 0.0682         |                        | 0.0120 | 0.0668         |                         | 0.0125 | 0.0682         |
| 4 <sub>li-ben</sub>     | 0.0123 | 0.0687         | 4 <sub>li-methyl</sub> | 0.0124 | 0.0692         | 4 <sub>li-benzoic</sub> | 0.0127 | 0.0704         |
|                         | 0.0124 | 0.0686         |                        | 0.0120 | 0.0665         |                         | 0.0127 | 0.0704         |
|                         | 0.0122 | 0.0679         |                        | 0.0124 | 0.0692         |                         | 0.0126 | 0.0691         |
| System                  | $\rho$ | $\nabla^2\rho$ | System                 | $\rho$ | $\nabla^2\rho$ | System                  | $\rho$ | $\nabla^2\rho$ |
| 1 <sub>li-aniline</sub> | 0.0152 | 0.0822         | 1 <sub>li-cyano</sub>  | 0.0156 | 0.0828         |                         |        |                |
| 2 <sub>li-aniline</sub> | 0.0143 | 0.0782         | 2 <sub>li-cyano</sub>  | 0.0141 | 0.0762         |                         |        |                |
|                         | 0.0136 | 0.0733         |                        | 0.0142 | 0.0771         |                         |        |                |
| 3 <sub>li-aniline</sub> | 0.0125 | 0.0702         | 3 <sub>li-cyano</sub>  | 0.0127 | 0.0704         |                         |        |                |
|                         | 0.0122 | 0.0664         |                        | 0.0128 | 0.0706         |                         |        |                |
|                         | 0.0125 | 0.0699         |                        | 0.0127 | 0.0698         |                         |        |                |
| 4 <sub>li-aniline</sub> | 0.0125 | 0.0700         | 4 <sub>li-cyano</sub>  | 0.0129 | 0.0710         |                         |        |                |
|                         | 0.0123 | 0.0672         |                        | 0.0128 | 0.0713         |                         |        |                |
|                         | 0.0125 | 0.0702         |                        | 0.0125 | 0.0688         |                         |        |                |

**Table S3.** Electron density and Laplacian of electron density at the BCP of  $(H)_2-Li^+$  for all the  $C_6H_6-Li^+$  and  $C_6H_5X-Li^+$  complexes.

| System              | $\rho$ | $\nabla^2\rho$ |
|---------------------|--------|----------------|
| 1 <sub>mg-ben</sub> | 0.0220 | 0.1040         |
| 2 <sub>mg-ben</sub> | 0.0192 | 0.0911         |
|                     | 0.0187 | 0.0876         |
| 3 <sub>mg-ben</sub> | 0.0167 | 0.0793         |
|                     | 0.0167 | 0.0793         |
|                     | 0.0167 | 0.0793         |
| 4 <sub>mg-ben</sub> | 0.0140 | 0.0655         |
|                     | 0.0140 | 0.0655         |
|                     | 0.0140 | 0.0655         |
|                     | 0.0140 | 0.0655         |
| 5 <sub>mg-ben</sub> | 0.0143 | 0.0671         |
|                     | 0.0135 | 0.0628         |
|                     | 0.0132 | 0.0609         |
|                     | 0.0157 | 0.0745         |

| System                  | $\rho$ | $\nabla^2\rho$ |
|-------------------------|--------|----------------|
| 1 <sub>mg-aniline</sub> | 0.0214 | 0.1012         |
| 2 <sub>mg-aniline</sub> | 0.0186 | 0.0880         |
|                         | 0.0181 | 0.0857         |
| 3 <sub>mg-aniline</sub> | 0.0166 | 0.0789         |
|                         | 0.0166 | 0.0790         |
|                         | 0.0160 | 0.0750         |
| 4 <sub>mg-aniline</sub> | 0.0130 | 0.0597         |
|                         | 0.0148 | 0.0699         |
|                         | 0.0143 | 0.0671         |
|                         | 0.0126 | 0.0543         |
| 5 <sub>mg-aniline</sub> | 0.0125 | 0.0570         |
|                         | 0.0161 | 0.0770         |
|                         | 0.0143 | 0.0671         |
|                         | 0.0125 | 0.0538         |

| System                 | $\rho$ | $\nabla^2\rho$ |
|------------------------|--------|----------------|
| 1 <sub>mg-methyl</sub> | 0.0217 | 0.1024         |
| 2 <sub>mg-methyl</sub> | 0.0191 | 0.0906         |
|                        | 0.0183 | 0.0856         |
| 3 <sub>mg-methyl</sub> | 0.0165 | 0.0786         |
|                        | 0.0165 | 0.0785         |
|                        | 0.0163 | 0.0775         |
| 4 <sub>mg-methyl</sub> | 0.0136 | 0.0628         |
|                        | 0.0144 | 0.0677         |
|                        | 0.0142 | 0.0667         |
|                        | 0.0132 | 0.0602         |
| 5 <sub>mg-methyl</sub> | 0.0127 | 0.0583         |
|                        | 0.0161 | 0.0770         |
|                        | 0.0143 | 0.0676         |
|                        | 0.0127 | 0.0575         |

| System                | $\rho$ | $\nabla^2\rho$ |
|-----------------------|--------|----------------|
| 1 <sub>mg-cyano</sub> | 0.0225 | 0.1048         |
| 2 <sub>mg-cyano</sub> | 0.0194 | 0.0907         |
|                       | 0.0195 | 0.0925         |
| 3 <sub>mg-cyano</sub> | 0.0173 | 0.0816         |
|                       | 0.0173 | 0.0822         |
|                       | 0.0172 | 0.0814         |
| 4 <sub>mg-cyano</sub> | 0.0143 | 0.0656         |
|                       | 0.0147 | 0.0687         |
|                       | 0.0147 | 0.0690         |
|                       | 0.0146 | 0.0681         |
| 5 <sub>mg-cyano</sub> | 0.0143 | 0.0666         |
|                       | 0.0147 | 0.0687         |
|                       | 0.0142 | 0.0658         |
|                       | 0.0159 | 0.0743         |

**Table S4.** Electron density and Laplacian of electron density at the BCP of (H)<sub>2</sub>-Mg<sup>2+</sup> for C<sub>6</sub>H<sub>6</sub>-Mg<sup>2+</sup> and C<sub>6</sub>H<sub>5</sub>X-Mg<sup>2+</sup> complexes.
